# Supplementary material for: A novel 3D Z-scheme heterojunction photocatalyst: Ag6Si2O7 anchored on flower-like Bi2WO6 and its excellent photocatalytic performance for the degradation of toxic pharmaceutical antibiotics
Source: Royal Society of Chemistry journal article supplement (doi:10.1039/c9qi01201j), 2019-11-13
Supplement: c9qi01201j1.pdf [file c9qi01201j1.pdf]

## Supplementary Data

### **A novel 3D Z-scheme heterojunction photocatalyst: $\text{Ag}_6\text{Si}_2\text{O}_7$ anchored on flower-like $\text{Bi}_2\text{WO}_6$ and its excellent photocatalytic performance for the degradation of toxic pharmaceutical antibiotics**

Shijie Li<sup>1\*</sup>, Jialin Chen<sup>1</sup>, Shiwei Hu<sup>1</sup>, Wei Jiang<sup>1</sup>, Yanping Liu<sup>1</sup>, Jianshe Liu<sup>2</sup>

<sup>1</sup> Key Laboratory of Health Risk Factors for Seafood of Zhejiang Province, Institute of Innovation & Application, Zhejiang Ocean University, Zhoushan, Zhejiang Province, 316022, China.

<sup>2</sup> State Environmental Protection Engineering Center for Pollution Treatment and Control in Textile Industry, College of Environmental Science and Engineering, Donghua University, Shanghai 201620, China.

\* Email: [lishijie@zjou.edu.cn](mailto:lishijie@zjou.edu.cn);

## Figures

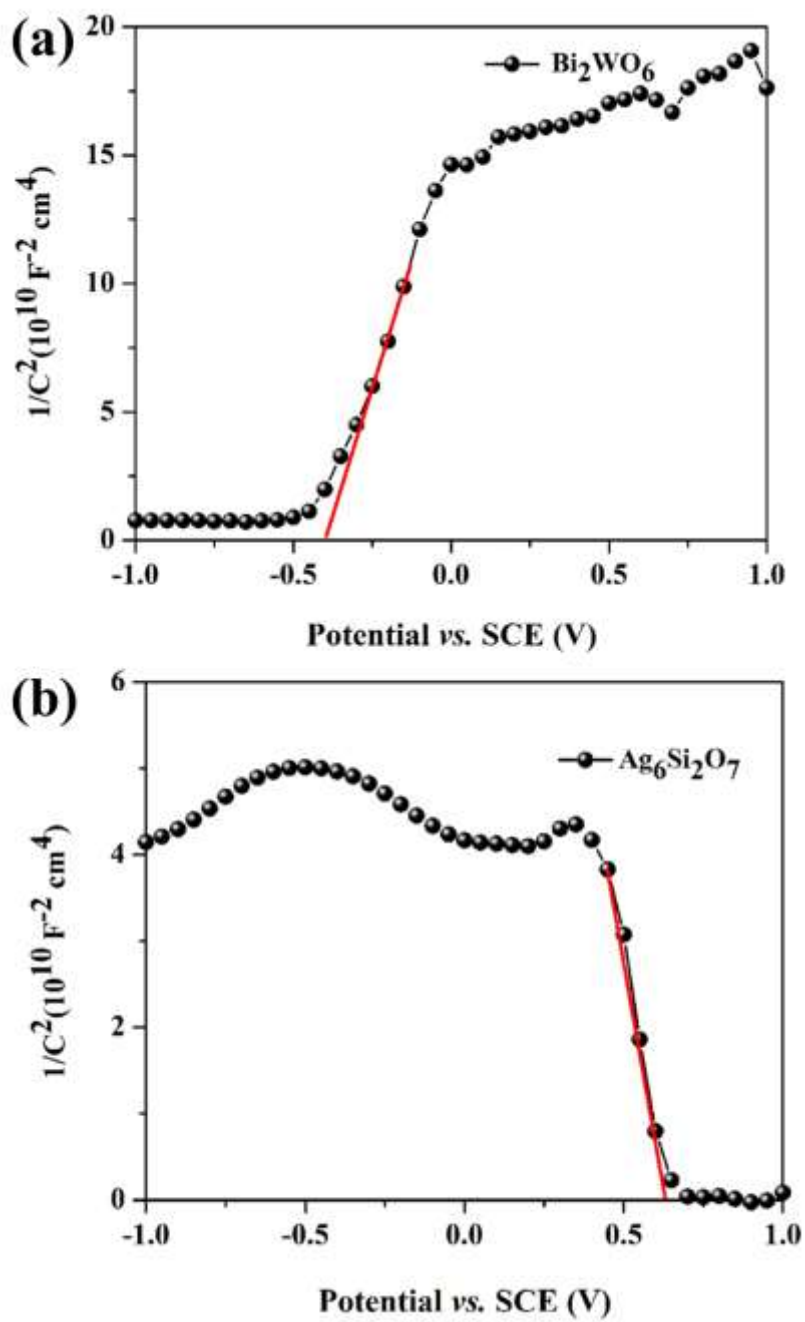

Figure S1 Mott-Schottky plots of  $\text{Bi}_2\text{WO}_6$  and  $\text{Ag}_6\text{Si}_2\text{O}_7$  photocatalysts.

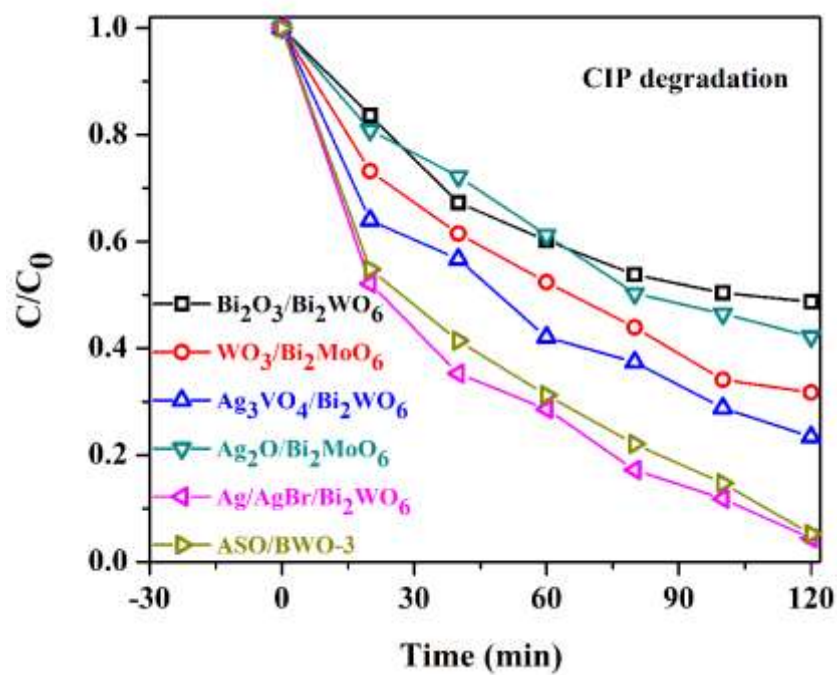

**Figure S2** Photocatalytic properties of as-obtained catalysts (50 mg) for eliminating CIP (20 mg/L, 80 mL)

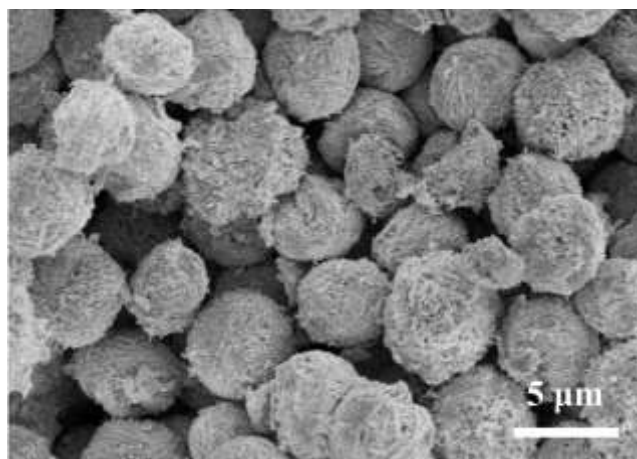

**Figure S3** SEM images of ASO/BWO-3 after recycling experiments

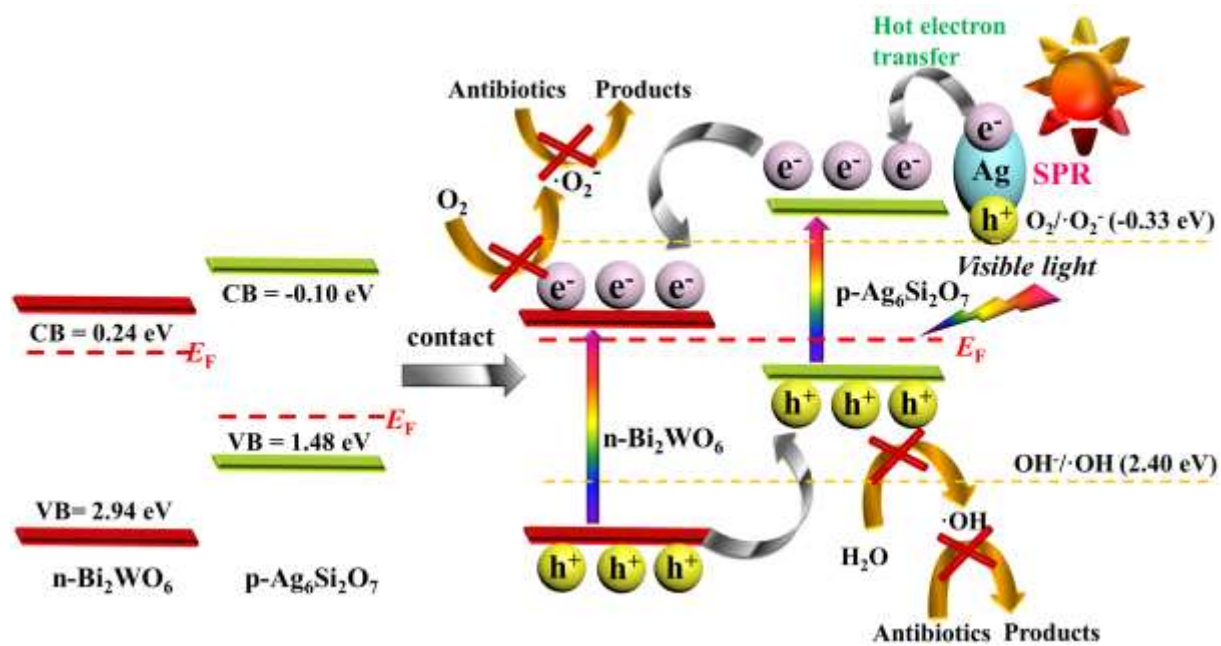

**Figure S4** The photocatalytic mechanism of the  $\text{Ag}_6\text{Si}_2\text{O}_7/\text{Bi}_2\text{WO}_6$  p-n heterojunction photocatalyst under VL.
